# Supplementary material for: Amino acid T25 in the substrate-binding domain of SARS-CoV-2 nsp5 is involved in viral replication in the mouse lung
Source: PubMed Central journal article supplement (PMC11623800; doi:10.1371/journal.pone.0312800), 2024-12-06
Supplement: pone.0312800.s001.pdf [file pone.0312800.s001.pdf]

**Amino acid T25 in the substrate-binding domain of SARS CoV-2 nsp5 is involved in viral replication in the mouse lung**

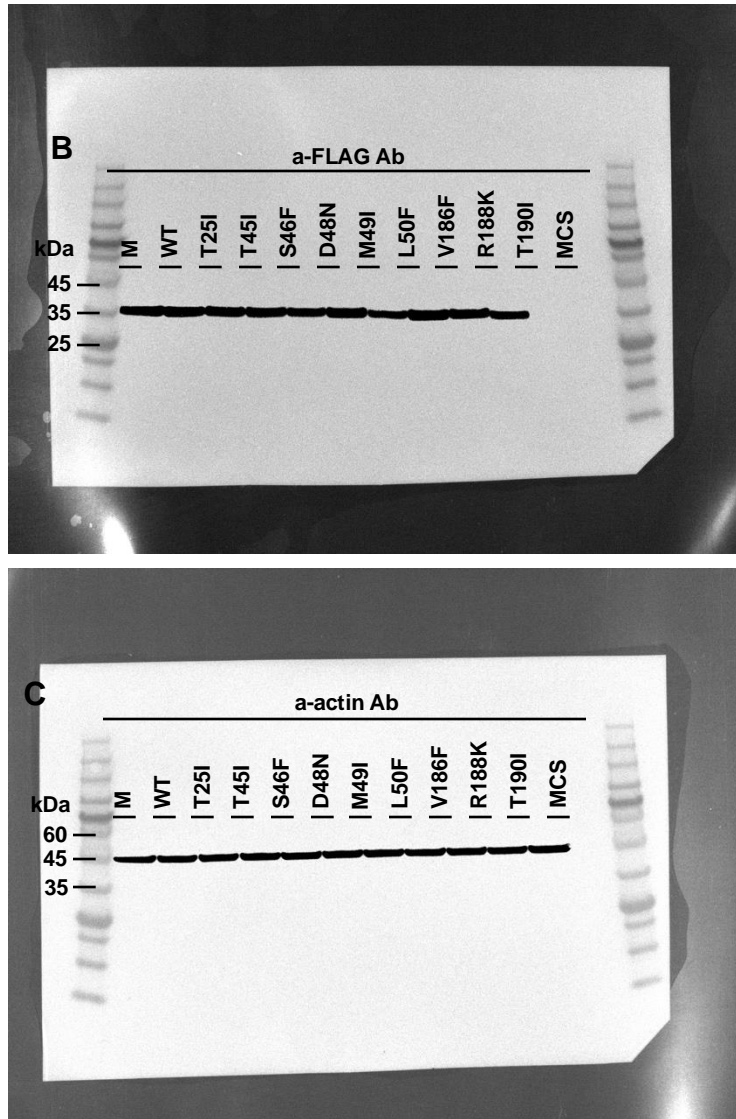

Supplementary Figure 1. Original Blots image, an unprocessed version in Figure 1B and 1D (B: anti-Flag and C: anti-actin)
