# Supplementary material for: Amino acid T25 in the substrate-binding domain of SARS-CoV-2 nsp5 is involved in viral replication in the mouse lung
Source: PubMed Central journal article supplement (PMC11623800; doi:10.1371/journal.pone.0312800), 2024-12-06
Supplement: pone.0312800.s002.pdf [file pone.0312800.s002.pdf]

Supplementary Materials

**Amino acid T25 in the substrate-binding domain of SARS CoV-2 nsp5 is involved in viral replication in the mouse lung**

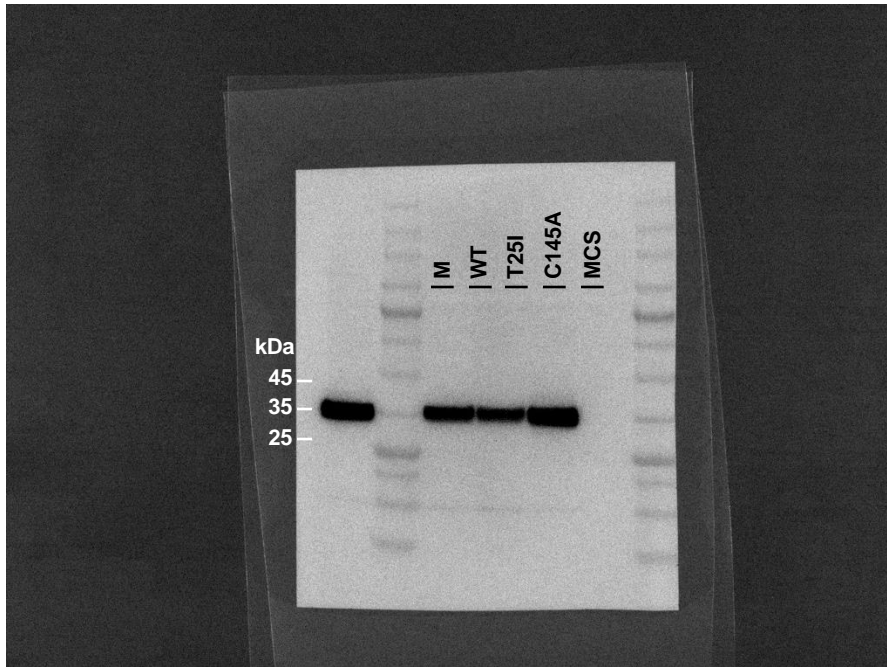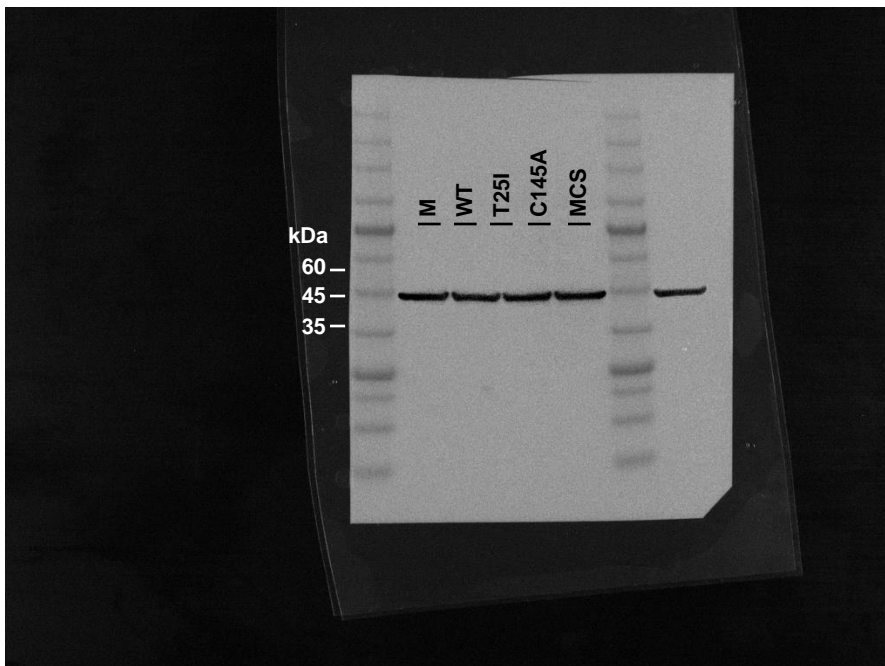

Supplementary Figure 2. Original Blots image, an unprocessed version in Figure 2D (top: anti-Flag and bottom: anti-actin)
