# Supplementary material for: Amino acid T25 in the substrate-binding domain of SARS-CoV-2 nsp5 is involved in viral replication in the mouse lung
Source: PubMed Central journal article supplement (PMC11623800; doi:10.1371/journal.pone.0312800), 2024-12-06
Supplement: pone.0312800.s003.pdf [file pone.0312800.s003.pdf]

## Key resources table

| REAGENT or RESOURCE                                                                                                                                                                                                                                                         | SOURCE                              | IDENTIFIER     |
|-----------------------------------------------------------------------------------------------------------------------------------------------------------------------------------------------------------------------------------------------------------------------------|-------------------------------------|----------------|
| Antibodies                                                                                                                                                                                                                                                                  |                                     |                |
| Anti-DDDDK(FLAG)-tag mAb                                                                                                                                                                                                                                                    | MBL                                 | Clone FLA-1    |
| Anti-Rabbit IgG (H+L), highly cross-adsorbed, CF™ 488A antibody                                                                                                                                                                                                             | Sigma-Aldrich                       | Cat#SAB4600045 |
| Virus strains                                                                                                                                                                                                                                                               |                                     |                |
| SARS-CoV-2                                                                                                                                                                                                                                                                  | NIID                                | WK-521 strain  |
| SARS-CoV-2                                                                                                                                                                                                                                                                  | Iwata-Yoshikawa <i>et al</i> , 2022 | QHmusX strain  |
| Chemicals and critical commercial assays                                                                                                                                                                                                                                    |                                     |                |
| Dulbecco's modified minimum essential medium                                                                                                                                                                                                                                | Nacalai Tesque                      | Cat#08458-16   |
| Fetal bovine serum                                                                                                                                                                                                                                                          | Biosera                             | Cat#FB-1285    |
| TRIzol™ Reagent                                                                                                                                                                                                                                                             | Thermo Fisher Scientific            | Cat#15596026   |
| PureLink RNA Mini kit                                                                                                                                                                                                                                                       | Thermo Fisher Scientific            | Cat#12183018A  |
| THUNDERBIRD Probe One-step qRT-PCR Kit                                                                                                                                                                                                                                      | TOYOBO                              | Cat#QRZ-101    |
| ReverTraACE qPCR RT Master Mix                                                                                                                                                                                                                                              | TOYOBO                              | Cat#FSQ-201    |
| THUNDERBIRD SYBR qPCR Mix                                                                                                                                                                                                                                                   | TOYOBO                              | Cat#QPS-201    |
| SuperScript IV                                                                                                                                                                                                                                                              | Thermo Fisher Scientific            | Cat#18090010   |
| QIAamp viral RNA Mini Kit                                                                                                                                                                                                                                                   | QIAGEN                              | Cat#52904      |
| 10% formalin neutral buffer solution                                                                                                                                                                                                                                        | Nacalai Tesque                      | Cat#37152-51   |
| Mayer's hematoxylin                                                                                                                                                                                                                                                         | Muto Pure Chemicals                 | Cat#30002      |
| 1% eosin Y solution                                                                                                                                                                                                                                                         | FUJIFILM                            | Cat#051-0615   |
| KOD One                                                                                                                                                                                                                                                                     | TOYOBO                              | Cat#KMM-101    |
| Gibson Assembly Ultra kits                                                                                                                                                                                                                                                  | Telesis Bio                         | Cat#GA1200     |
| TransIT-LT1                                                                                                                                                                                                                                                                 | Mirus                               | Cat# MIR2304   |
| 4% paraformaldehyde                                                                                                                                                                                                                                                         | Nacalai Tesque                      | Cat#09154-85   |
| Experimental models: Cell lines                                                                                                                                                                                                                                             |                                     |                |
| 293T/hACE2cells                                                                                                                                                                                                                                                             | This paper                          | N/A            |
| VeroE6/hTMPRSS2 cells                                                                                                                                                                                                                                                       | Matsuyama <i>et al</i> , 2020       | N/A            |
| Experimental models: mice                                                                                                                                                                                                                                                   |                                     |                |
| BALB/cCrSlc mice                                                                                                                                                                                                                                                            | Japan SLC                           | N/A            |
| Recombinant DNA                                                                                                                                                                                                                                                             |                                     |                |
| pBAC-SARS2-QHmusX-WT                                                                                                                                                                                                                                                        | This paper                          | N/A            |
| pBAC-SARS2-QHmusX-T25I                                                                                                                                                                                                                                                      | This paper                          | N/A            |
| pGlo-VTFQS                                                                                                                                                                                                                                                                  | This paper                          | N/A            |
| pCAGGS-SARS2-nsp5-T25I-FLAG, pCAGGS-SARS2-nsp5-T45I-FLAG, pCAGGS-SARS2-nsp5-S46F-FLAG, pCAGGS-SARS2-nsp5-D48N-FLAG, pCAGGS-SARS2-nsp5-M49I-FLAG, pCAGGS-SARS2-nsp5-L50F-FLAG, pCAGGS-SARS2-nsp5-V186F-FLAG, pCAGGS-SARS2-nsp5-R188K-FLAG, and pCAGGS-SARS2-nsp5-T190I-FLAG. | This paper                          | N/A            |
| Software and algorithms                                                                                                                                                                                                                                                     |                                     |                |
| Prism 10                                                                                                                                                                                                                                                                    | GraphPad                            | N/A            |
